# Supplementary material for: A biochemical framework for anaerobic oxidation of methane driven by Fe(III)-dependent respiration
Source: PubMed Central journal article supplement (PMC5915437; doi:10.1038/s41467-018-04097-9), 2018-04-24
Supplement: 41467_2018_4097_MOESM1_ESM.pdf [file 41467_2018_4097_MOESM1_ESM.pdf]

## **Supplementary Information**

A biochemical framework for Fe(III)-dependent anaerobic oxidation of methane

Yan *et al.*

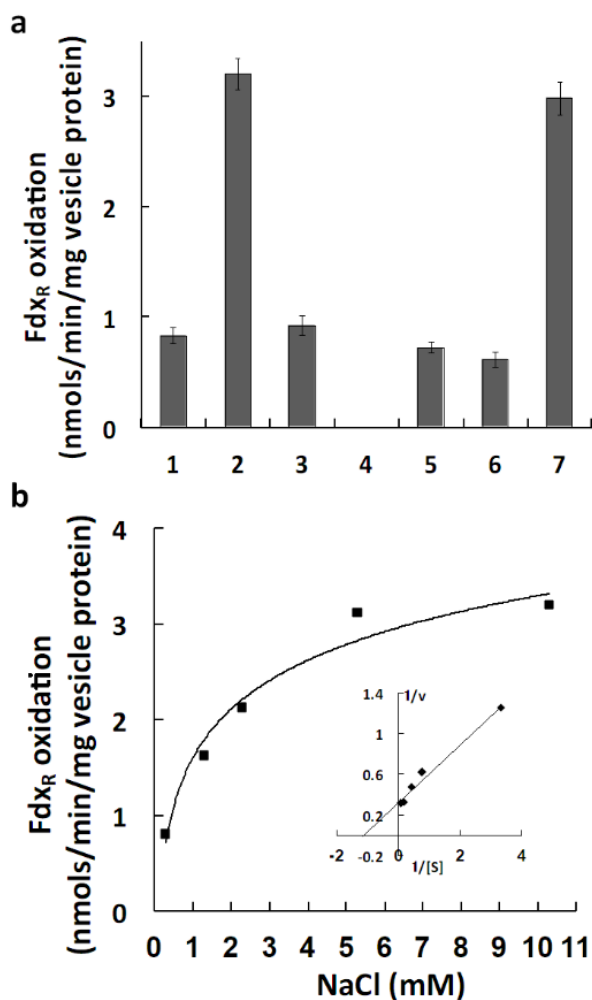

**Supplementary Figure 1. Fdx<sub>R</sub>:Fe(III) oxidoreductase activity of everted membrane vesicles.** The standard reaction mixture (0.5 ml) contained 20.5 μM pre-reduced ferredoxin (Fdx<sub>R</sub>) and 10 mM NaCl in 50 mM Tris (pH 8.0) and 1.0 atmosphere of Ar. Reactions were initiated by addition of Fe(III)-loaded vesicles (0.05 mg protein) prepared from acetate-grown cells. Oxidation of Fdx<sub>R</sub> was monitored at 410 nm. **a** Initial velocity of Fdx<sub>R</sub> oxidation in standard reaction mixtures modified as indicated for each bar: (1) minus NaCl, (2) standard, no modifications, (3) minus NaCl, plus 10 mM KCl, (4) empty vesicles, (5) Fe(III)-loaded vesicles from methanol-grown cells, (6) 9,10-anthraquinone-2,6-disulfonate (AQDS)-loaded vesicles, (7) AQDS- plus Fe(III)-loaded vesicles. Bars are the mean of three biological replicates for which error bars are the standard deviation. **b** Initial velocity of Fdx<sub>R</sub> oxidation in the standard reaction mixture dependent on the concentration of NaCl. Inset, double-reciprocal plot.

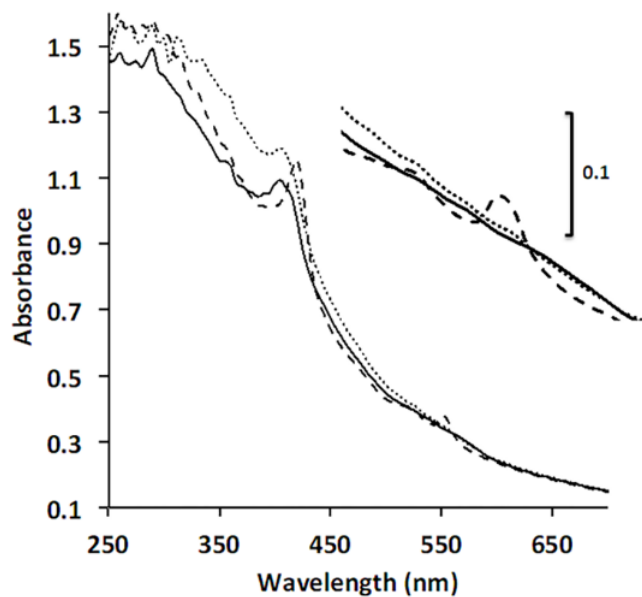

**Supplementary Figure 2. UV-Vis spectrum of cytochrome *c* in membranes from acetate-grown *M. acetivorans* reduced with ferredoxin and re-oxidized with Fe(III).** Isolated membrane fragments (0.1 mg protein) were contained in 0.5 ml 50 mM Tris (pH 8.0) and 1.0 atmosphere of Ar. As isolated (solid line); after addition of 2.5  $\mu\text{M}$  pre-reduced ferredoxin ( $\text{Fd}_{\text{XR}}$ ) to as-isolated (dash line); after addition of 10  $\mu\text{M}$  ferric citrate to  $\text{Fd}_{\text{XR}}$ -reduced (dotted line). Inset, spectrum enlarged between 500 and 600 nm. Reduction by  $\text{Fd}_{\text{XR}}$  is documented by the increased absorbance at 550 nm and shift of the 405 nm peak to 407 nm. Spectra were recorded with a CARY 50 Bio UV-Vis spectrophotometer.

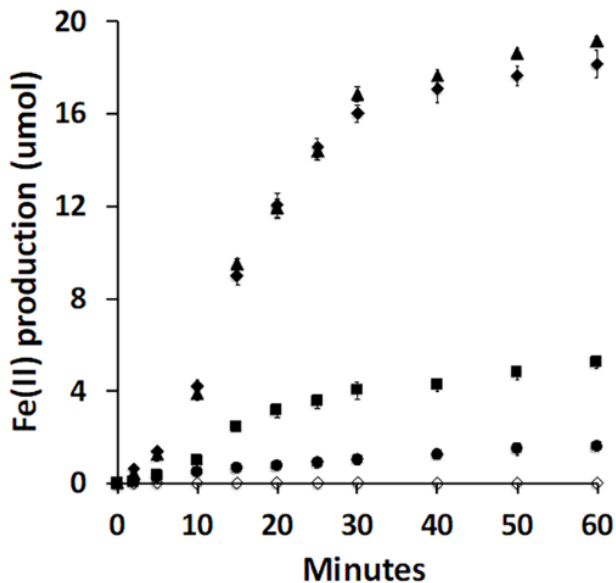

**Supplementary Figure 3. Reduction of ferric citrate and ferrihydrite by resting cell suspensions of *M. acetivorans*.** The reaction mixture (5 ml) contained 0.25 g (wet weight) acetate-grown cells and 0.5 mM 9,10-anthraquinone-2,6-disulfonate (AQDS) where indicated in 50 mM MOPS-Na buffer (pH 7.0) and 0.1 atmosphere CO. The reaction was started by adding 5 mM ferric citrate or ferrihydrite. Ferrihydrite was prepared as described elsewhere<sup>1</sup>. Symbols: (▲) ferric citrate plus AQDS, (◆) ferric citrate, (■) ferrihydrite plus AQDS, (●) ferrihydrite, (◇) minus electron acceptor or 1.0 atmosphere N<sub>2</sub>. Data points are the mean of three biological replicates for which the standard deviation is shown by error bars.

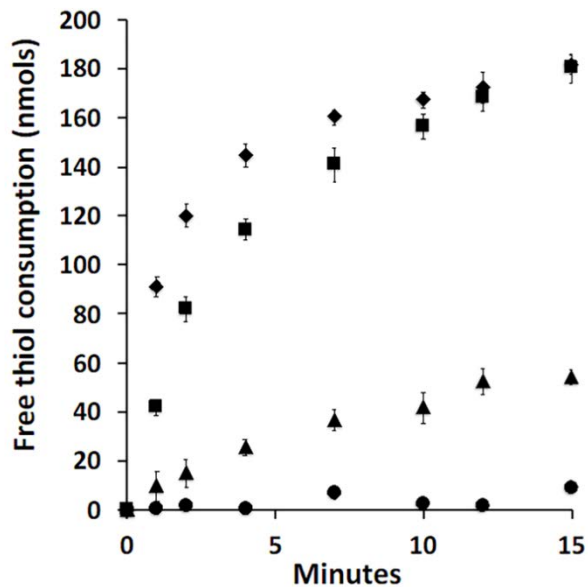

**Supplementary Figure 4. Methyltransferase activity in the direction of CH<sub>3</sub>-SCoM production.** The standard reaction mixture (1.0 ml) contained 3.0 mM coenzyme M (HSCoM), 1.5 mM methyl-tetrahydrofolate (CH<sub>3</sub>-THF), 2 mM ATP, 0.4 M sucrose, 20 mM MgSO<sub>4</sub>, 1.0 mM dithiothreitol and empty vesicles (0.5 mg protein) from acetate-grown cells in 50 mM MOPS buffer (pH 7.0) in 1.0 atmosphere of CO. Symbols: (◆) standard reaction mixture, (■) minus CO, (▲) minus ATP, (●) minus HSCoM or CH<sub>3</sub>-THF. Data points are the mean of three biological replicates for which the standard deviation is shown by error bars.

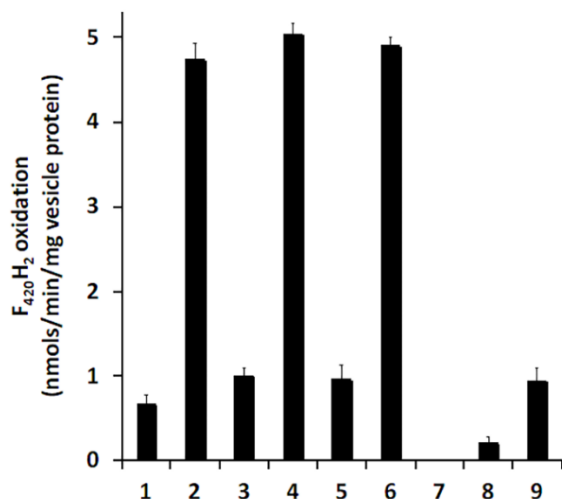

**Supplementary Figure 5.  $F_{420}H_2$ :Fe(III) oxidoreductase activity of everted membrane vesicles.** The standard reaction mixture (0.5 ml) contained 12.5  $\mu$ M reduced coenzyme  $F_{420}$  ( $F_{420}H_2$ ) in 50 mM Tris pH 8.0 and 1.0 atmosphere Ar. Reactions were initiated by addition of Fe(III)-loaded everted vesicles (50  $\mu$ g protein) from methanol-grown cells. Values shown are initial rates of  $F_{420}H_2$  oxidation monitored at 420 nm with a CARY 50 Bio-UV-Vis spectrophotometer. Bars are the mean of three biological replicates for which the standard deviation is shown by error bars. Standard reaction mixtures were modified as indicated: (1) no modification, (2) plus 2.0  $\mu$ M carbonyl cyanide m-chlorophenyl hydrazine (CCCP), (3) 9,10-anthraquinone-2,6-disulfonate (AQDS)-loaded vesicles, (4) AQDS-loaded vesicles plus 2.0  $\mu$ M CCCP, (5) AQDS- and Fe(III)-loaded vesicles, (6) AQDS- and Fe(III)-loaded vesicles plus 2.0  $\mu$ M CCCP, (7) empty vesicles, (8) Fe(III)-loaded vesicles from acetate-grown cells, (9) Fe(III)-loaded vesicles from acetate-grown cells plus 2.0  $\mu$ M CCCP.

| Enzyme (reaction Number)* | Reaction                                                                                                                                                                                                       | $\Delta G^{\circ}$ (kJ)   |
|---------------------------|----------------------------------------------------------------------------------------------------------------------------------------------------------------------------------------------------------------|---------------------------|
| Mcr (1)                   | 5 x ( $\text{CH}_4 + \text{CoMS-SCoB} \rightarrow \text{CH}_3\text{-SCoM} + \text{HSCoB}$ )                                                                                                                    | 5 x (+45.0) <sup>a</sup>  |
| Mtr (2)                   | 5 x ( $\text{CH}_3\text{-SCoM} + \text{H}_4\text{SPT} \rightarrow \text{CH}_3\text{-H}_4\text{SPT} + \text{HS-CoM}$ )                                                                                          | 5 x (+30.0) <sup>a</sup>  |
| Rnf (3)                   | 5 x ( $\text{Fd}_{\text{XR}} + 2\text{Fe}^{3+} \rightarrow 2\text{Fe}^{2+} + \text{Fd}_{\text{XO}}$ )                                                                                                          | 5 x (-249.3) <sup>b</sup> |
| HdrDE (4)                 | 5 x ( $\text{HS-CoM} + \text{HS-CoB} + 2\text{Fe}^{3+} \rightarrow \text{CoMS-SCoB} + 2\text{Fe}^{2+} + 2\text{H}^+$ )                                                                                         | 5 x (-175.8) <sup>c</sup> |
| CODH/ACS (5)              | $\text{CH}_3\text{-H}_4\text{SPT} + \text{CO}_2 + \text{HS-CoA} + \text{Fd}_{\text{XR}} + 2\text{H}^+ \rightarrow \text{CH}_3\text{-SCoA} + \text{H}_4\text{SPT} + \text{H}_2\text{O} + \text{Fd}_{\text{XO}}$ | -40.5 <sup>d</sup>        |
| Pta, Ack (6)              | $\text{CH}_3\text{-CO-SCoA} + \text{H}_2\text{O} \rightarrow \text{HS-CoA} + \text{CH}_3\text{COOH}$                                                                                                           | -35.7 <sup>a</sup>        |
| Mer, Mtd, Mch (7)         | 4 x ( $\text{CH}_3\text{-H}_4\text{HPT} + 2\text{F}_{420} \rightarrow \text{CHO-H}_4\text{HPT} + 2\text{F}_{420}\text{H}_2$ )                                                                                  | 4 x (-5.3) <sup>a</sup>   |
| Ftr, Fmd (8)              | 4 x ( $\text{CHO-H}_4\text{HPT} + \text{Fd}_{\text{XO}} + \text{H}_2\text{O} \rightarrow \text{Fd}_{\text{XR}} + \text{H}_4\text{HPT} + \text{CO}_2 + \text{H}^+$ )                                            | 4 x (-32.0) <sup>d</sup>  |
| Fpo (9)                   | 4 x ( $\text{F}_{420}\text{H}_2 + 2\text{Fe}^{3+} \rightarrow \text{F}_{420} + 2\text{Fe}^{2+} + 2\text{H}^+$ )                                                                                                | 4 x (-222.3) <sup>e</sup> |
| HdrA2B2C2 (10-12)         | 2 x ( $2\text{F}_{420}\text{H}_2 + 2\text{Fd}_{\text{XO}} + \text{CoMS-SCoB} \rightarrow 2\text{F}_{420} + 2\text{Fd}_{\text{XR}} + \text{HSCoM} + \text{HSCoB}$ )                                             | 2 x (-38.5) <sup>f</sup>  |
| HdrDE (13)                | 2 x ( $\text{HS-CoM} + \text{HS-CoB} + 2\text{Fe}^{3+} \rightarrow \text{CoMS-SCoB} + 2\text{Fe}^{2+} + 2\text{H}^+$ )                                                                                         | 2 x (-175.8) <sup>c</sup> |
| Atp (14)                  | 13 x ( $\text{ADP} + \text{HPO}_4^- \rightarrow \text{ATP} + \text{H}_2\text{O}$ )                                                                                                                             | 13 x (+31.8) <sup>a</sup> |
| Overall                   | 5 $\text{CH}_4 + 32\text{Fe}^{3+} + 13\text{ADP} + 13\text{HPO}_4^- \rightarrow \text{CH}_3\text{COOH} + 32\text{Fe}^{2+} + 19\text{H}^+ + 13\text{ATP} + 3\text{CO}_2 + 5\text{H}_2\text{O}$                  | -2,880.3 kJ               |

\*See Figure 5 for corresponding reaction numbers. Mcr, methyl-coenzyme M reductase; Mtr, methyltransferase; HdrDE, membrane-bound heterodisulfide reductase; Cyt c, multi-heme cytochrome c; CODH/ACS, CO dehydrogenase/acetyl-CoA synthase; Pta, phosphotransacetylase; Ack, acetate kinase; Mer, F<sub>420</sub>-dependent methylene-H<sub>4</sub>MPT reductase; Mtd, F<sub>420</sub>-dependent methylene-H<sub>4</sub>MPT dehydrogenase; Mch, methenyl-H<sub>4</sub>MPT cyclohydrolase; Ftr, formylmethanofuran:H<sub>4</sub>MPT formyltransferase; Fmd, formylmethanofuran dehydrogenase; HdrA2B2C2, cytoplasmic heterodisulfide reductase; Rnf, Rnf complex.

<sup>a</sup>Published values<sup>2,3</sup>.

<sup>b</sup>Calculated with published standard midpoint potentials (+772 mV for Fe<sup>3+</sup>/Fe<sup>2+</sup> and -520 mV for Fd<sub>XO</sub>/Fd<sub>XR</sub><sup>2-</sup>) using  $\Delta G = -nF\Delta E$  and the Faraday constant of 0.09648 kJ/eV<sup>3</sup>.

<sup>c</sup>Calculated with published standard midpoint potentials (+772 mV for Fe<sup>3+</sup>/Fe<sup>2+</sup> and -140 mV for CoMS-SCoB/HSCoM + HSCoB) using  $\Delta G = -nF\Delta E$  and the Faraday constant of 0.09648 kJ/eV<sup>3,4</sup>.

<sup>d</sup>Published value<sup>2</sup>.

<sup>e</sup>Calculated with standard midpoint potentials (-520 mV for Fd<sub>XO</sub>/Fd<sub>XR</sub><sup>2-</sup> and -380 mV for F<sub>420</sub>/F<sub>420</sub>H<sub>2</sub>) using  $\Delta G = -nF\Delta E$  and the Faraday constant of 0.09648 kJ/eV.

<sup>f</sup>Calculated with published standard midpoint potentials (-520 mV for Fd<sub>XO</sub>/Fd<sub>XR</sub><sup>1-</sup>, -140 mV for CoMS-SCoB/HSCoM + HSCoB and -380 mV for F<sub>420</sub>/F<sub>420</sub>H<sub>2</sub>) using  $\Delta G = -nF\Delta E$  and the Faraday constant of 0.09648 kJ/eV.

**Supplementary Table 1.** Standard Gibbs free energy values for reactions in the Fe(III)-dependent ANME pathway proposed for *Methanosarcina acetivorans*.

| ANME-2a    |                                                   | Query            |                | Subject          |                |        | Identities | <i>M. acetivorans</i> |        |
|------------|---------------------------------------------------|------------------|----------------|------------------|----------------|--------|------------|-----------------------|--------|
| Gene Id    | Gene Name                                         | Start Coordinate | End Coordinate | Start Coordinate | End Coordinate | Length |            | loci                  | length |
| 2566124572 | electron transport complex protein RnfB           | 3                | 263            | 5                | 264            | 274    | 61         | RnfB<br>MA0663        | 264    |
| 2566124573 | electron transport complex protein RnfA           | 4                | 197            | 1                | 193            | 194    | 61         | RnfA<br>MA0663        | 199    |
| 2566124577 | electron transport complex protein RnfC           | 17               | 432            | 9                | 403            | 441    | 39         | RnfC<br>MA0659        | 447    |
| 2566124576 | electron transport complex protein RnfD           | 3                | 285            | 2                | 291            | 293    | 46         | RnfD<br>MA0660        | 288    |
| 2566124574 | electron transport complex protein RnfE           | 7                | 213            | 2                | 206            | 207    | 68         | RnfE<br>MA0662        | 213    |
| 2566124575 | electron transport complex protein RnfG           | 4                | 186            | 2                | 176            | 176    | 44         | RnfG<br>MA0661        | 188    |
|            |                                                   |                  |                |                  |                |        |            |                       |        |
| 2566124578 | multiheme c-type cytochrome                       | 24               | 494            | 20               | 475            | 477    | 36         | CytC<br>MA0658        | 500    |
|            |                                                   |                  |                |                  |                |        |            |                       |        |
| 2566123507 | F420H2 dehydrogenase subunit A                    | 1                | 124            | 1                | 132            | 132    | 54         | FpoA<br>MA1495        | 124    |
| 2566123508 | F420H2 dehydrogenase subunit B                    | 21               | 180            | 17               | 176            | 187    | 69         | FpoB<br>MA1496        | 184    |
| 2566123510 | F420H2 dehydrogenase subunit D                    | 6                | 374            | 13               | 376            | 376    | 58         | FpoD<br>MA1498        | 374    |
| 2566123511 | F420H2 dehydrogenase subunit H                    | 13               | 345            | 19               | 348            | 350    | 57         | FpoH<br>MA1499        | 348    |
| 2566123512 | F420H2 dehydrogenase subunit I                    | 1                | 125            | 1                | 115            | 131    | 47         | FpoI<br>MA1500        | 136    |
| 2566123513 | F420H2 dehydrogenase subunit J                    | 30               | 88             | 23               | 81             | 85     | 54         | FpoJ<br>MA1501        | 96     |
| 2566123515 | F420H2 dehydrogenase subunit K                    | 4                | 102            | 2                | 100            | 100    | 60         | FpoK<br>MA1503        | 102    |
| 2566123516 | F420H2 dehydrogenase subunit L                    | 5                | 666            | 2                | 676            | 681    | 59         | FpoL<br>MA1504        | 672    |
| 2566123518 | F420H2 dehydrogenase subunit N                    | 8                | 488            | 11               | 490            | 492    | 56         | FpoN<br>MA1506        | 489    |
| 2566123509 | F420H2 dehydrogenase subunit C                    | 1                | 153            | 1                | 150            | 150    | 55         | FpoC<br>MA1507        | 158    |
| 2566123517 | F420H2 dehydrogenase subunit M                    | 4                | 486            | 5                | 488            | 493    | 55         | FpoM<br>MA1505        | 495    |
|            |                                                   |                  |                |                  |                |        |            |                       |        |
| 2566126466 | heterodisulfide reductase, subunit D              | 1                | 409            | 11               | 435            | 459    | 55         | HdrD<br>MA0688        | 409    |
| 2566126467 | heterodisulfide reductase, subunit E              | 1                | 264            | 1                | 248            | 248    | 43         | HdrE MA               | 264    |
|            |                                                   |                  |                |                  |                |        |            |                       |        |
| 2566125857 | methyltransferase, subunit A                      | 1                | 224            | 1                | 224            | 242    | 63         | MtrA<br>MA0272        | 240    |
| 2566125858 | methyltransferase, subunit B                      | 1                | 108            | 1                | 104            | 104    | 43         | MtrB<br>MA0273        | 108    |
| 2566125859 | methyltransferase, subunit C                      | 7                | 267            | 6                | 284            | 284    | 54         | MtrC<br>MA0274        | 267    |
| 2566125860 | methyltransferase, subunit D                      | 10               | 240            | 11               | 245            | 252    | 61         | MtrD<br>MA0275        | 249    |
| 2566125861 | methyltransferase, subunit E                      | 4                | 304            | 6                | 301            | 301    | 61         | MtrE<br>MA0276        | 304    |
| 2566125856 | methyltransferase, subunit F                      | 7                | 73             | 46               | 113            | 115    | 50         | MtrF<br>MA0271        | 74     |
| 2566125855 | methyltransferase, subunit G                      | 1                | 65             | 1                | 65             | 86     | 51         | MtrG<br>MA0270        | 73     |
| 2566125854 | methyltransferase, subunit H                      | 1                | 315            | 1                | 311            | 312    | 73         | MtrH<br>MA0269        | 316    |
|            |                                                   |                  |                |                  |                |        |            |                       |        |
| 2566123466 | acetyl-CoA decarboxylase/synthase alpha subunit   | 4                | 805            | 3                | 791            | 793    | 59         | CdhA<br>MA3860        | 805    |
| 2566123467 | acetyl-CoA decarboxylase/synthase epsilon subunit | 2                | 170            | 6                | 176            | 176    | 46         | CdhB<br>MA3861        | 170    |
| 2566123468 | acetyl-CoA decarboxylase/synthase beta subunit    | 3                | 467            | 4                | 466            | 466    | 66         | CdhC<br>MA3862        | 470    |
| 2566123469 | CO dehydrogenase maturation factor                | 3                | 252            | 2                | 248            | 249    | 57         | CdhD<br>MA3863        | 253    |
| 2566123471 | acetyl-CoA decarboxylase/synthase delta subunit   | 1                | 436            | 1                | 434            | 434    | 69         | CdhE<br>MA3864        | 436    |



|            |                                               |   |     |    |     |     |    |           |     |
|------------|-----------------------------------------------|---|-----|----|-----|-----|----|-----------|-----|
| 2566125579 | methyl-coenzyme M reductase,<br>alpha subunit | 9 | 570 | 16 | 575 | 575 | 69 | McrA 4546 | 570 |
| 2566125583 | methyl-coenzyme M reductase,<br>beta subunit  | 1 | 434 | 1  | 434 | 434 | 66 | McrB 4550 | 434 |
| 2566125580 | methyl-coenzyme M reductase,<br>gamma subunit | 1 | 248 | 1  | 248 | 248 | 77 | McrG 4547 | 248 |

**Supplementary Table 2.** Sequence identities for proteins in pathways proposed for *Methanosarcina acetivorans* and uncultured ANME-2a. The *Methanosarcinales* sp. ANME-2a genome (ID 2565956544) (<https://img.jgi.doe.gov/>) was queried with protein sequences from *Methanosarcina acetivorans* (<https://www.ncbi.nlm.nih.gov>).

## Supplementary References

- 1 Yamada, C., Kato, S., Kimura, S., Ishii, M. & Igarashi, Y. Reduction of Fe(III) oxides by phylogenetically and physiologically diverse thermophilic methanogens. *FEMS Microbiol. Ecol.* **89**, 637-645 (2014).
- 2 Thauer, R. K. Biochemistry of methanogenesis: a tribute to Marjory Stephenson. *Microbiol.* **144**, 2377-2406 (1998).
- 3 Thauer, R. K., Jungermann, K. & Decker, K. Energy conservation in chemotrophic anaerobic bacteria. *Bacteriol. Rev.* **41**, 100-180 (1977).
- 4 Thauer, R. K., Kaster, A. K., Seedorf, H., Buckel, W. & Hedderich, R. Methanogenic archaea: ecologically relevant differences in energy conservation. *Nat. Rev. Microbiol.* **6**, 579-591 (2008).
